# Supplementary material
Source: PubMed Central journal article supplement (PMC10083145)
Supplement: NIHMS1874947-supplement-Supplementary_Figures.pdf [file NIHMS1874947-supplement-Supplementary_Figures.pdf]

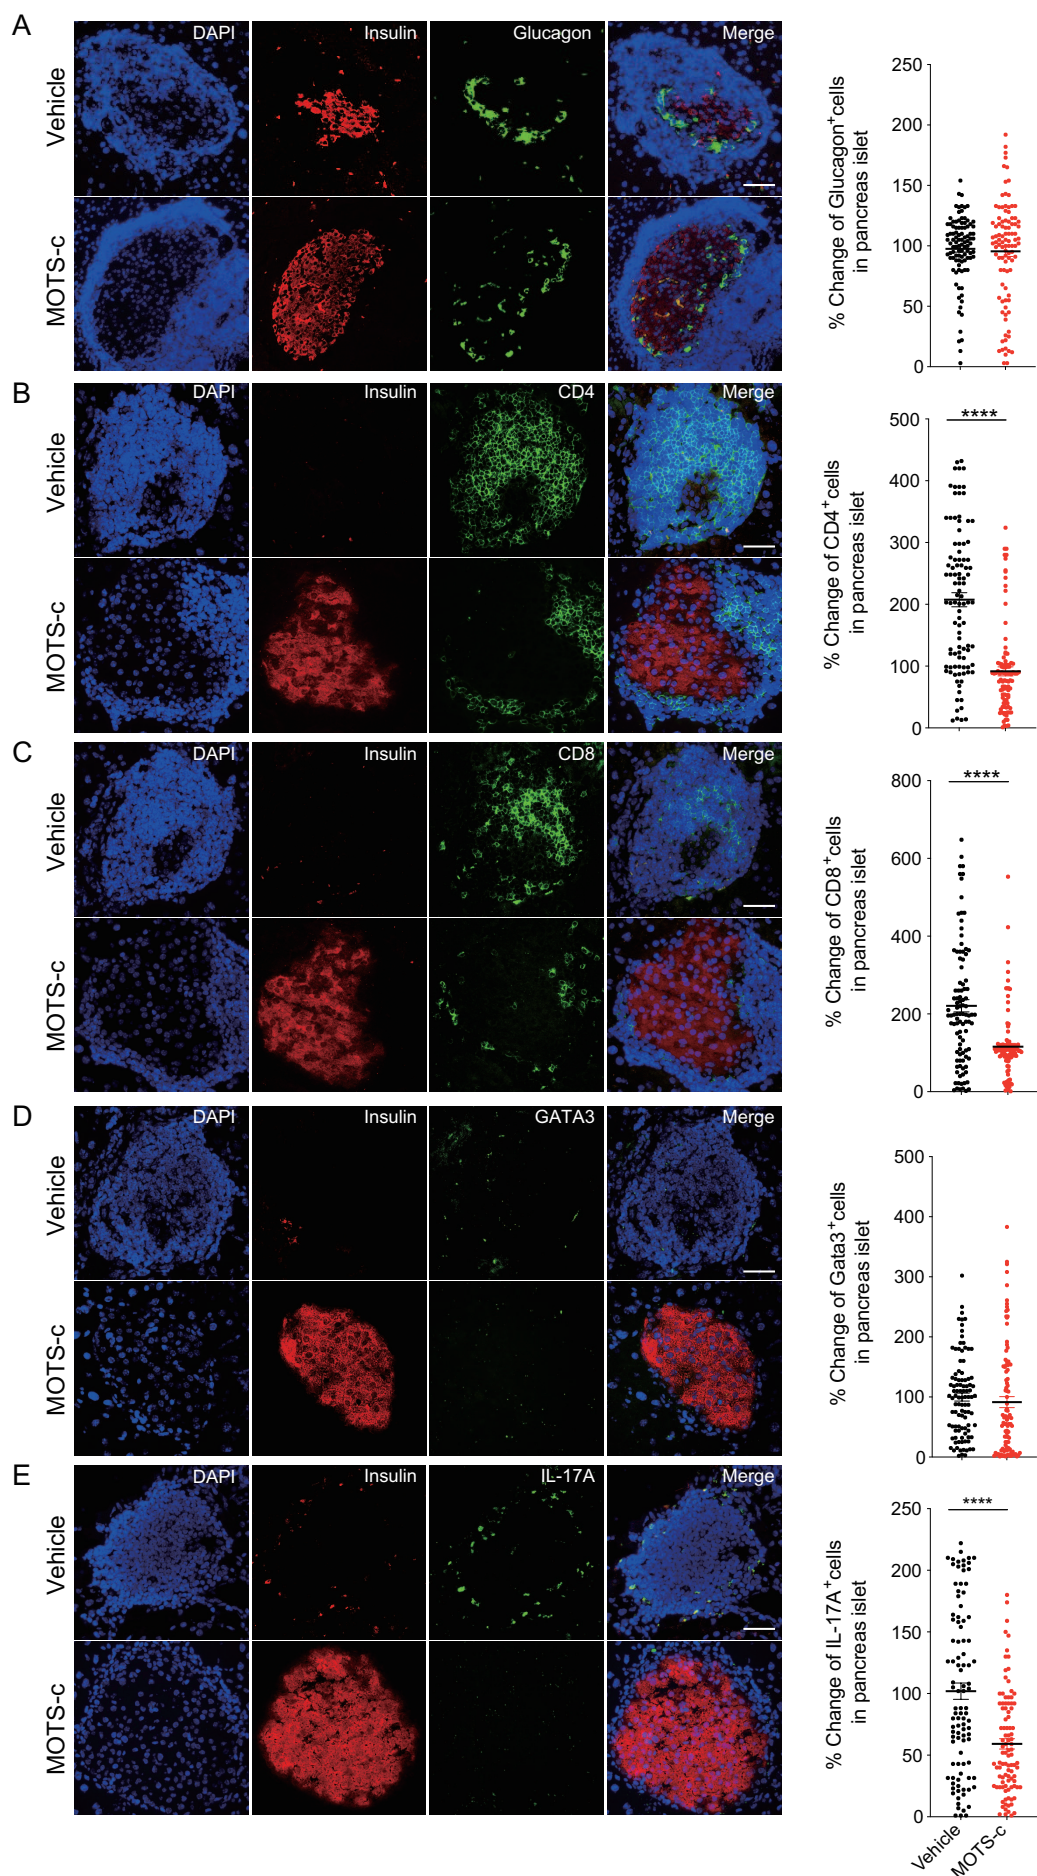

Supplemental Figure 1, related to Fig. 1 and 2.

18 weeks old-NOD mice pancreas sections were stained with insulin (red); and (A) glucagon, (B) CD4, (C) CD8, (D) GATA3, and (E) IL-17A (green) were performed. IF staining on pancreatic sections were prepared as described and the representative data and graphs from ten pancreases with ten sections for each group (n=100). Error bars are S.E.M, \*\*\*\*p<0.0001, Student's t-test. Scale bars: 50  $\mu$ m.



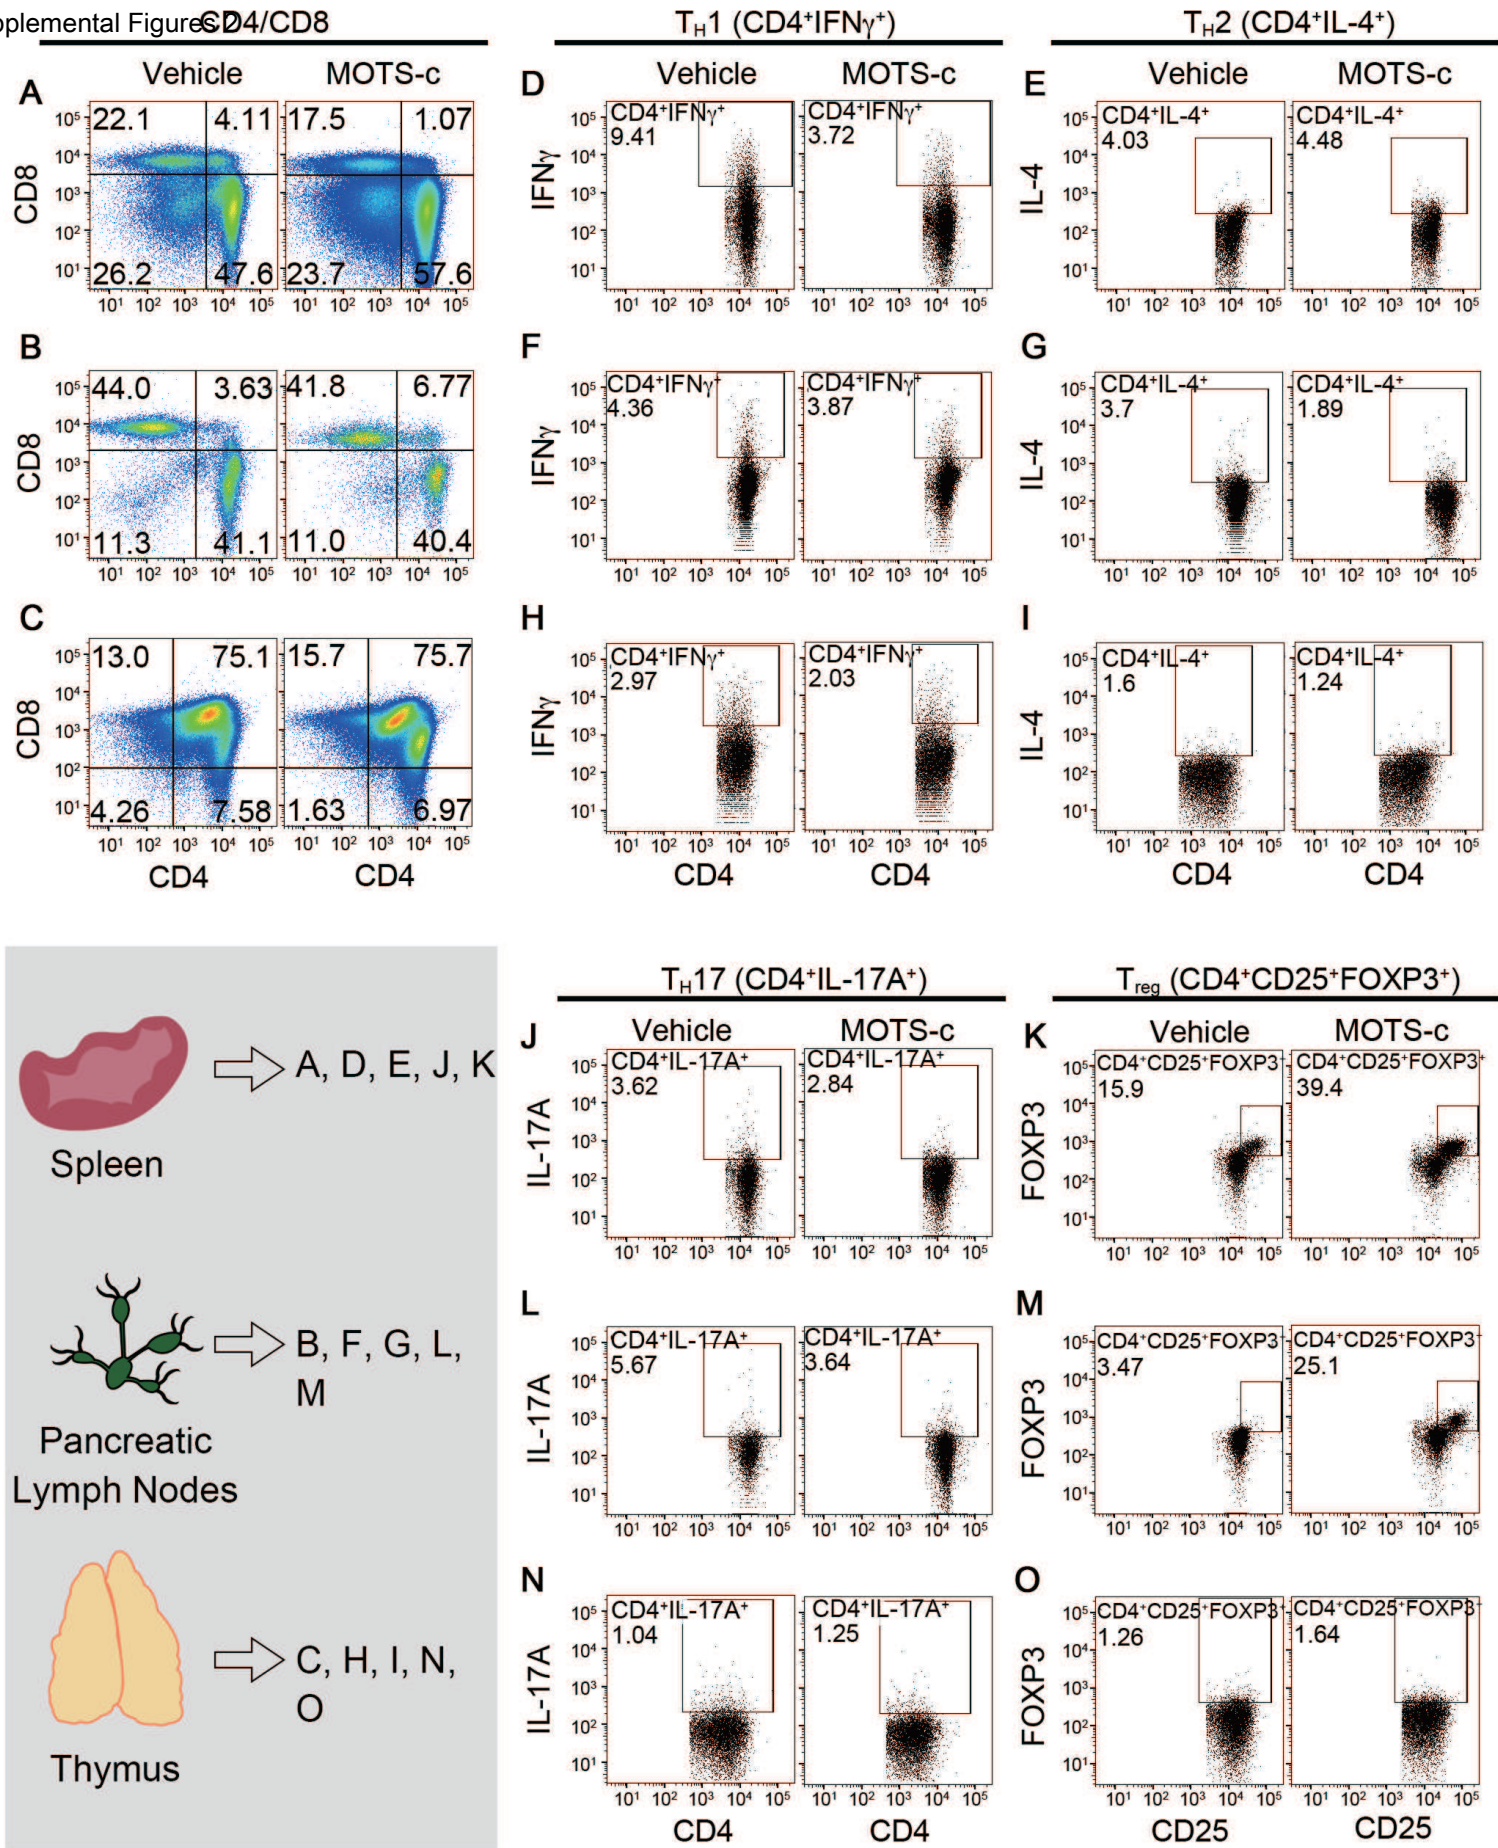

Supplemental Figure 2, related to Fig. 2.

Representative graphs for NOD CD4<sup>+</sup> and CD8<sup>+</sup> T cells (n=10) in (A) spleen, (B) pancreatic lymph nodes, and (C) thymus. NOD CD4<sup>+</sup> T cells were subdivided into T<sub>H</sub>1 (CD4<sup>+</sup>IFN $\gamma$ <sup>+</sup>), T<sub>H</sub>2 (CD4<sup>+</sup>IL-4<sup>+</sup>), T<sub>H</sub>17 (CD4<sup>+</sup>IL-17A<sup>+</sup>), and T<sub>reg</sub> (CD4<sup>+</sup>CD25<sup>+</sup>FOXP3<sup>+</sup>) in (D, E, J, K) spleen, (F, G, L, M) pancreatic lymph nodes, and (H, I, N, O) thymus.

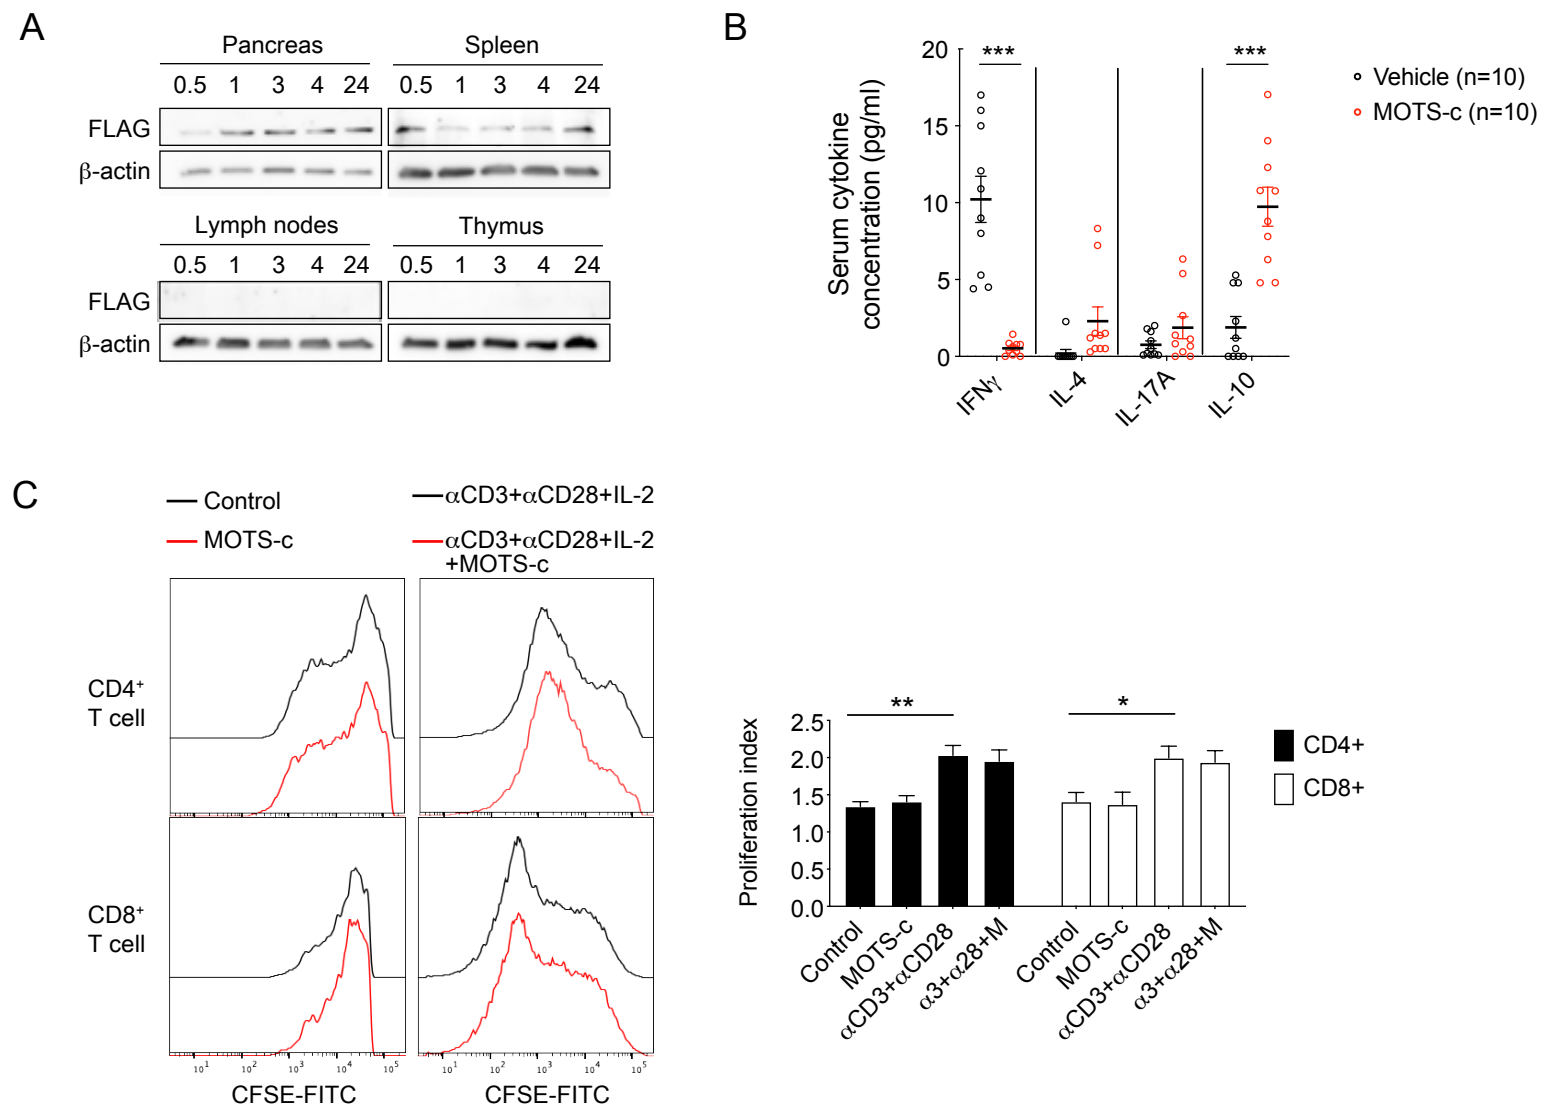

Supplemental Figure 3, related to Fig. 3. MOTS-c increases IL-10 production and CD206 expression in CD11b<sup>+</sup> cells.

**A.** C57BL/6J mice were i.v. injected with flagged-MOTS-c (10 mg/kg) in time dependent manner. Pancreas, spleen, lymph nodes, and thymus were isolated from each mouse to detect FLAG in whole cell lysates. Data are from one representative of five independent experiments.

**B.** 18-week-old NOD serum were analyzed for immune cell related cytokines (n=10); two-way ANOVA, \*\*\*p<0.001.

**C.** For proliferation assay, CFSE-stained CD4<sup>+</sup> and CD8<sup>+</sup> T cells isolated from NOD mice were stimulated with CD3 and CD28 antibodies (2 ug/ml each) for 3 days to evaluate T cell proliferation in the presence or absence of MOTS-c (10  $\mu$ M); data are mean values  $\pm$ SEM of three independent experiments.

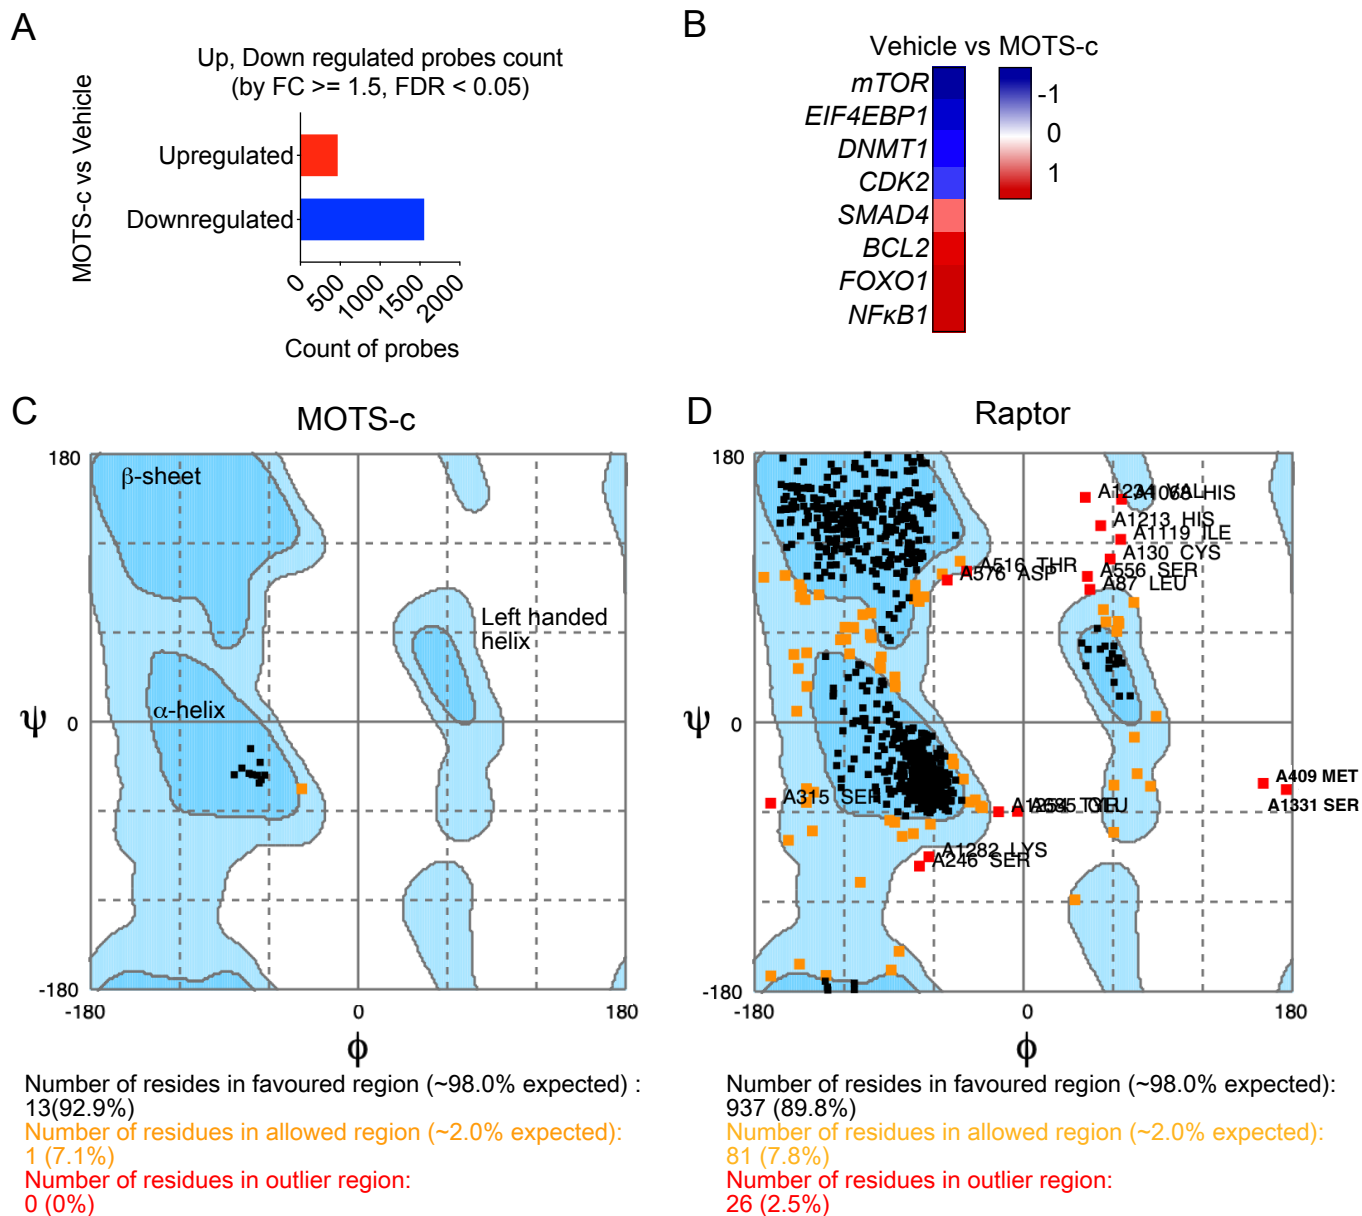

Supplemental Figure 4, related to Fig. 3

**A.** Microarray analyses on NOD splenocytes treated with either vehicle or MOTS-c for 18 weeks of age ( $n=3$ ). Graph shows significantly up- or down-regulated probes count with fold change of 1.5 or higher and FDR less than 0.05.

**B.** KEGG analysis on Th1 and Treg related genes.

**C, D.** The full Raptor structure (PDB ID:5WBI) was used as template for MOTS-c homology modeling. Ramachandran plot statistics for (C) MOTS-c and (D) Raptor are shown.



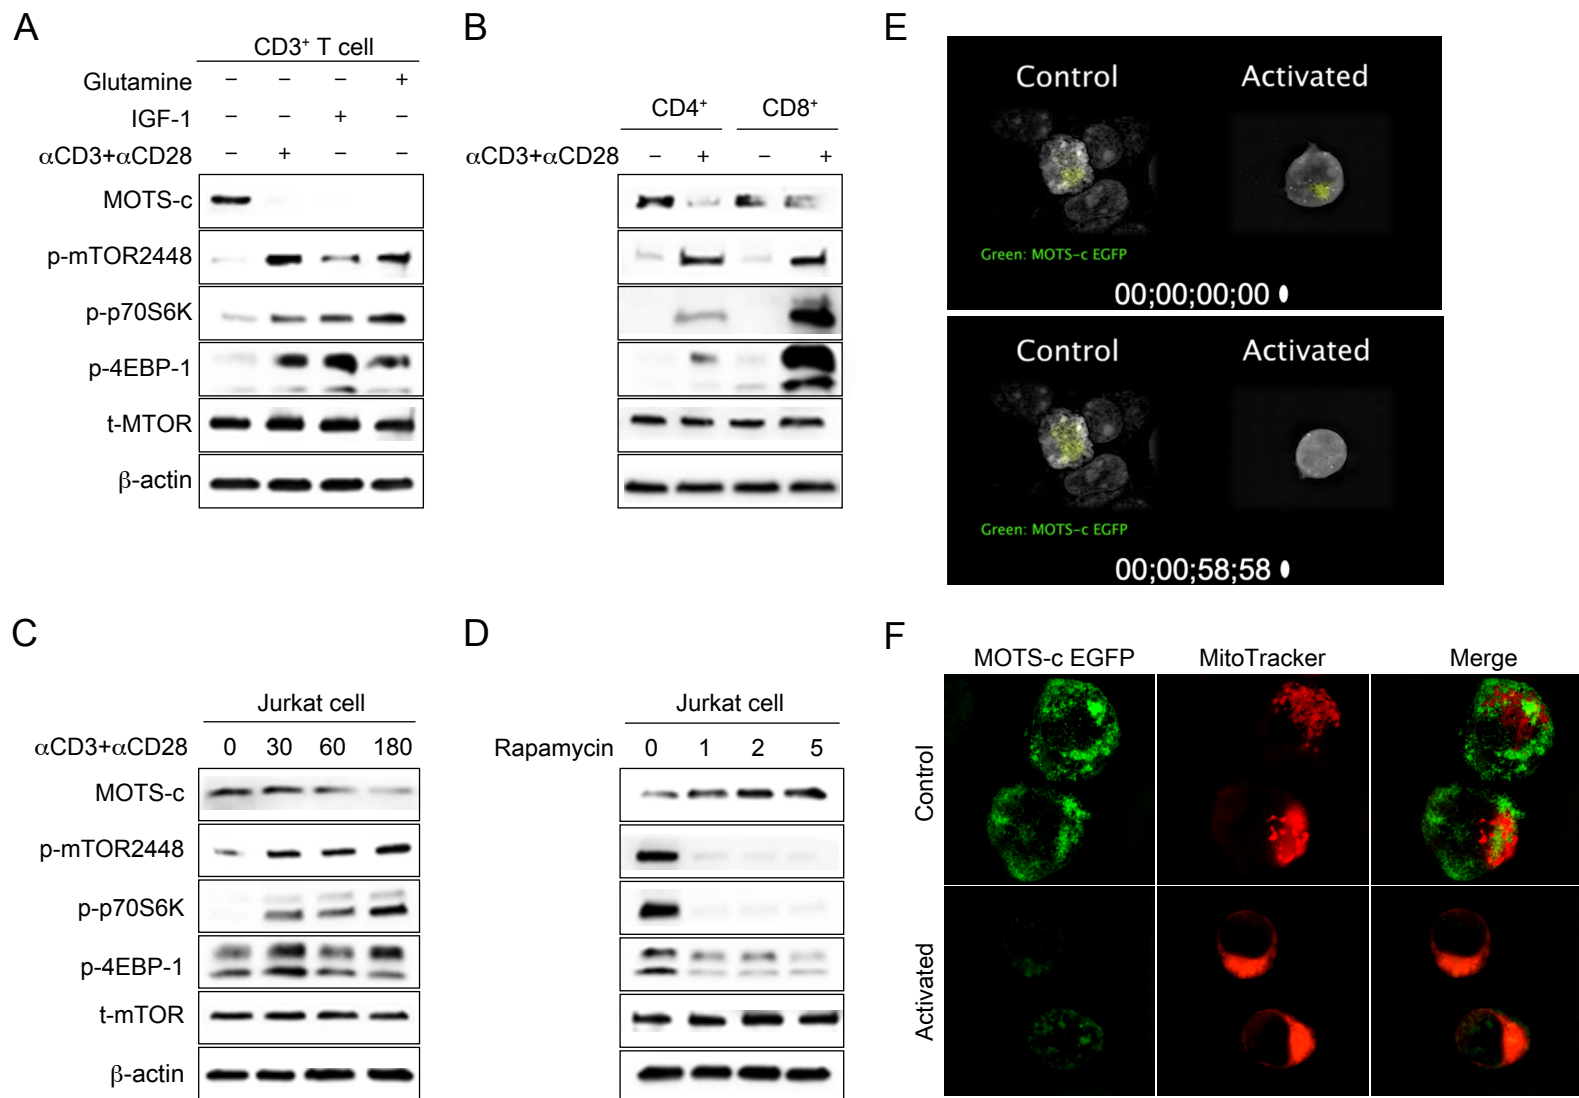

Supplemental Figure 5, related to Fig. 3, 4.

CD3<sup>+</sup>, CD4<sup>+</sup>, CD8<sup>+</sup> T cells were negatively isolated from C57BL/6J mice spleen. T cells were activated with either soluble mouse  $\alpha$ CD3 (4  $\mu$ g/ml) and  $\alpha$ CD28 (10  $\mu$ g/ml), IGF-1 (1  $\mu$ g/ml), or glutamine (5 mM), as previously reported for mTORC1 induction, for following conditions: **(A)** CD3<sup>+</sup> T cells (30 min) and **(B)** CD4<sup>+</sup> and CD8<sup>+</sup> T cells (30 min).

Jurkat cells were treated with **(C)** human  $\alpha$ CD3 (4  $\mu$ g/ml) and  $\alpha$ CD28 (10  $\mu$ g/ml) in time-dependent manner and with **(D)** rapamycin in concentration-dependent manner. MOTS-c tagged with EGFP Jurkat cells were activated with human  $\alpha$ CD3 (4  $\mu$ g/ml) and  $\alpha$ CD28 (10  $\mu$ g/ml) (3 hours). Then, cells were fixed to analyze cells with time-lapse live imaging with **(E)** Nanolive and **(F)** confocal microscopy. Data are from one representative of five independent experiments.

# Supplemental Figures 6

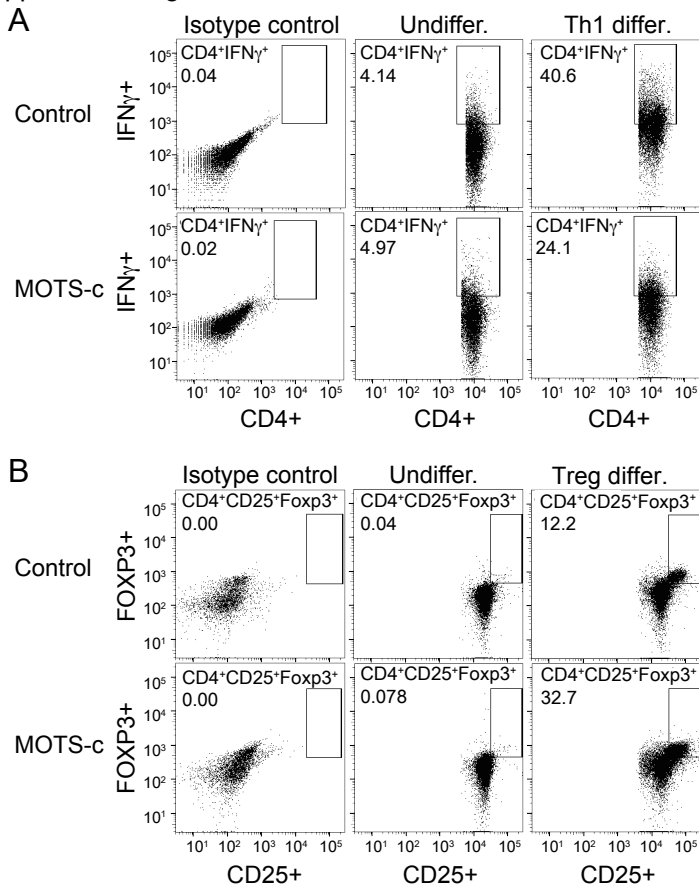

Supplemental Figure 6, related to Fig. 4.

CD4<sup>+</sup>T cells were negatively isolated from C57BL/6J mice spleen. (A) T<sub>H</sub>1 or (B) T<sub>reg</sub> polarization were performed, as described in the method, in the presence or absence of MOTS-c (10  $\mu$ M). Then, cells were stained with adequate antibodies for FACS analysis (n=5).

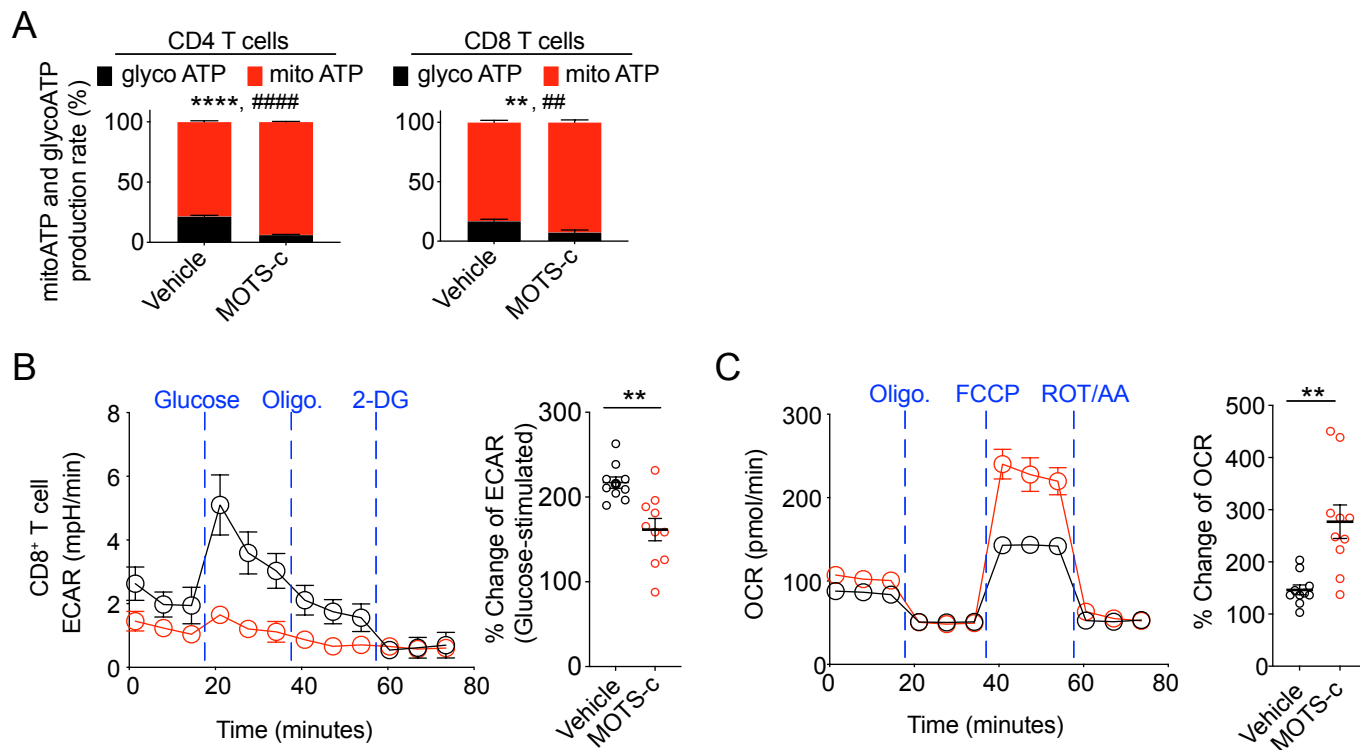

Supplemental Figure 7, related to Fig. 5

**A.** mitoATP/glycoATP production rate on NOD CD4<sup>+</sup> and CD8<sup>+</sup> T cells (n=5), two-way ANOVA, \*\*p<0.01, \*\*\*\*p<0.0001 between group, #p<0.01, #####p<0.0001 between glycoATP and mitoATP.

**B.** Glycolysis assessment after glucose treatment in NOD CD8<sup>+</sup> T cells (n=10), Student's t-test, \*\*p<0.01.

**C.** Assessment of respiratory capacity in NOD CD8<sup>+</sup> T cells (n=10), Student's t-test, \*\*p<0.01.



## Supplemental Figures 8

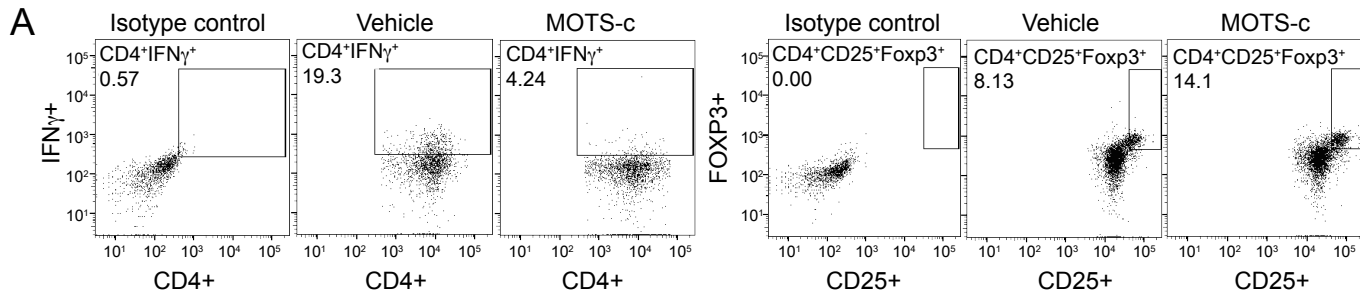

Supplemental Figure 8, related to Fig. 6

**A.** 18-week-old NOD splenocytes ( $1 \times 10^7$  cells, donor) from each group were i.v. injected to 6-week-old NOD/SCID mice ( $n=4$ , recipient). NOD-SCID mice were sacrificed after 18-weeks post-transfer. Then, the recipient NOD-SCID spleens were isolated to analyze **(A)** CD4<sup>+</sup>IFN $\gamma$ <sup>+</sup> and CD4<sup>+</sup>CD25<sup>+</sup>FOXP3<sup>+</sup> cells.

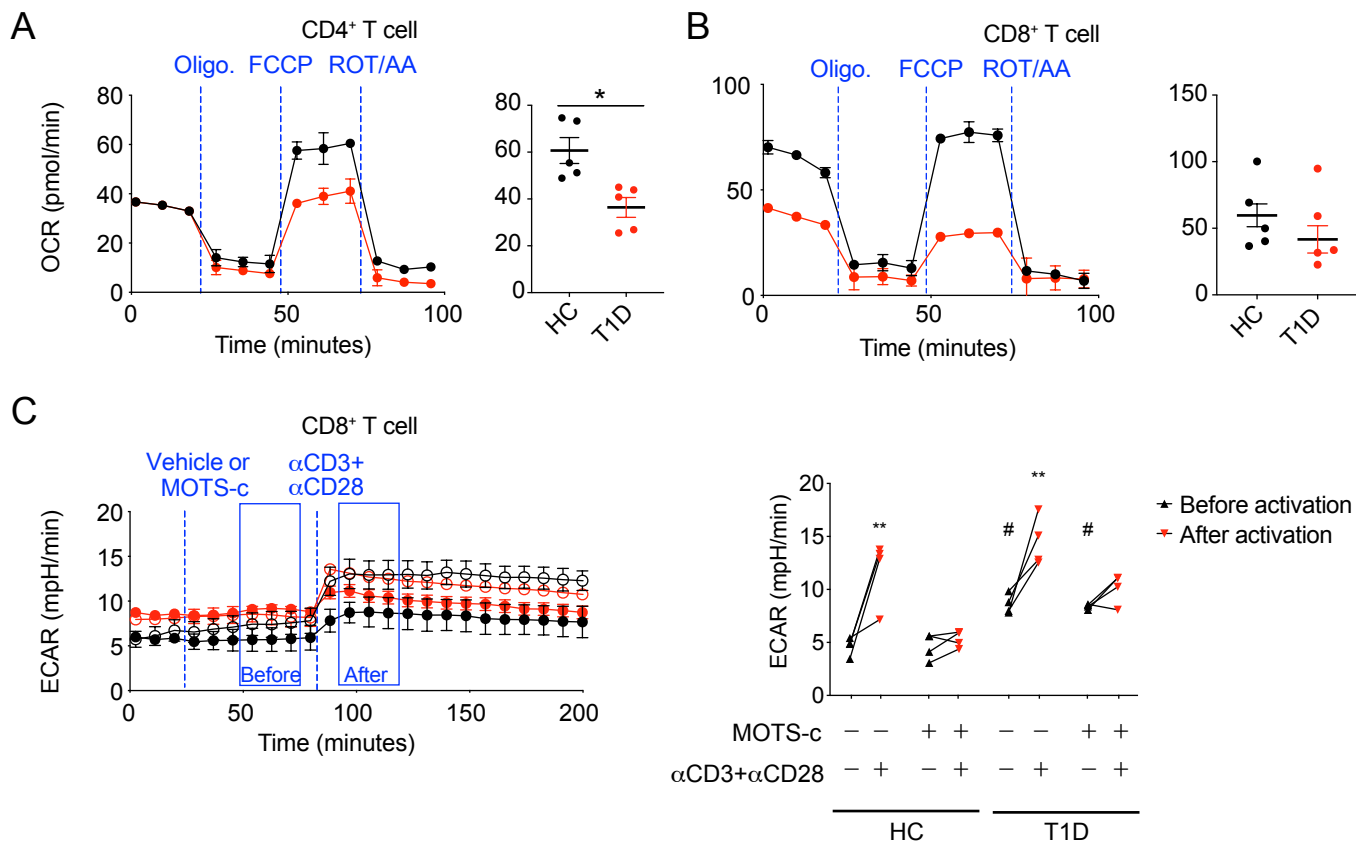

Supplemental Figure. 9, related to Fig. 7

**A-C.** Human PBMC-derived T cells were isolated from healthy controls and T1D patients to assess respiratory capacity of **(A)** CD4<sup>+</sup> T cells (n=5) and **(B)** CD8<sup>+</sup> T cells (n=5); error bars are S.E.M, \*p<0.05, \*\*p<0.01, two-tailed t-test.

**C.** For the real-time human T cell activation, T1D patients and healthy controls (HC) CD8<sup>+</sup> T cells were analyzed by Xfe96 Seahorse analyzer (n=4). T cells were activated with human αCD3 (4 μg/ml) and αCD28 (20 μg/ml) in the presence or absence of MOTS-c (10 μM); error bars are S.E.M, two-way ANOVA, #p<0.05 indicates significance between HC and T1D \*\*p<0.01, #p<0.05,
